# Supplementary material
Source: PubMed Central journal article supplement (PMC6755718)
Supplement: DS_10.1177_0022034519866442.pdf [file DS_10.1177_0022034519866442.pdf]

# Oral Diseases Associated with Nonalcoholic Fatty Liver Disease in the United States

J.A. Weintraub, G. Lopez Mitnik, and B.A. Dye

Journal of Dental Research, 2019

Appendix: Tables 1-5, Figure 1

Appendix Table 1. Assessments of Non-Alcoholic Fatty Liver Disease (NAFLD)

|                                                                                                                                                                                                                                                                                                               |
|---------------------------------------------------------------------------------------------------------------------------------------------------------------------------------------------------------------------------------------------------------------------------------------------------------------|
| 1. USON = NAFLD determined using Ultrasonography Image                                                                                                                                                                                                                                                        |
| 2. $FS = -1.675 + 0.037 * Age + 0.094 * BMI + 1.13 * Diabetes + 0.99 * \frac{AST}{ALT} - 0.013 * Platelet - 0.66 * Albumin$                                                                                                                                                                                   |
| 3. $FLI = \frac{e^{(0.953 * \ln(Trg) + 0.139 * BMI + 0.718 * \ln(GGT) + 0.053 * WC - 15.745)}}{(1 + e^{(0.953 * \ln(Trg) + 0.139 * BMI + 0.718 * \ln(GGT) + 0.053 * WC - 15.745)})} * 100$                                                                                                                    |
| 4. $US - FLI = \frac{e^{(-0.8073 * NHB + 0.345 * MxA + 0.0093 * Age + 0.6151 * \ln(GGT) + 0.0249 * WC + 1.1792 * \ln(Ins) + 0.8242 * \ln(Glu) - 14.7812)}}{(1 + e^{(-0.8073 * NHB + 0.345 * MxA + 0.0093 * Age + 0.6151 * \ln(GGT) + 0.0249 * WC + 1.1792 * \ln(Ins) + 0.8242 * \ln(Glu) - 14.7812)})} * 100$ |

ALT: alanine aminotransferase; AST: aspartate aminotransferase; BMI: Body Mass Index; FLI: Fatty Liver Index; FS: Fibrosis Score; GGT: Gamma-Glutamyl Transferase; Glu: Glucose; Ins: Insulin; MxA: Mexican American; NHB: Non-Hispanic Black; Trg: triglycerides; US-FLI: US Fatty Liver Index; USON = ultrasonography to determine NAFLD; WC: Waist Circumference

**Notes for Tables 2-5:** The gray shaded cells indicate statistically significant Odds Ratios ( $p < 0.05$ ). Crude model is unadjusted; Full model is adjusted; NAFLD = Non-alcoholic fatty liver disease; NHANES = National Health and Nutrition Examination Survey; Demo = Demographic; NHW = Non-Hispanic White; NHB = Non-Hispanic Black; HS = High School; FPG = Federal Poverty Guideline; OR = Odds Ratio; LCI and UCI = Lower and Upper 95% Confidence Interval

**Appendix Table 2a: Unadjusted, Adjusted and Final Logistic Regression Analysis with respect to the Ultrasonography (USON) Assessment of NAFLD, NHANES 1988-1994**

|                  |                                                           | Model 1: Demographic Variables |      |      |            |      |      |             |      |      | Model 2: Demo. and Num. of Permanent Teeth Variables |      |      |            |      |      |             |      |      |
|------------------|-----------------------------------------------------------|--------------------------------|------|------|------------|------|------|-------------|------|------|------------------------------------------------------|------|------|------------|------|------|-------------|------|------|
| Variable         |                                                           | Crude Model                    |      |      | Full Model |      |      | Final Model |      |      | Crude Model                                          |      |      | Full Model |      |      | Final Model |      |      |
|                  |                                                           | OR                             | LCI  | UCI  | OR         | LCI  | UCI  | OR          | LCI  | UCI  | OR                                                   | LCI  | UCI  | OR         | LCI  | UCI  | OR          | LCI  | UCI  |
| Demo Variables   | Age 40-59 years vs. 21-39 years                           | 1.98                           | 1.49 | 2.62 | 1.83       | 1.38 | 2.44 | 1.92        | 1.46 | 2.54 | 1.98                                                 | 1.49 | 2.62 | 1.73       | 1.28 | 2.34 | 1.78        | 1.33 | 2.39 |
|                  | Age 60-74 years vs. 21-39 years                           | 2.20                           | 1.61 | 3.02 | 2.05       | 1.48 | 2.83 | 2.18        | 1.61 | 2.97 | 2.20                                                 | 1.61 | 3.02 | 1.84       | 1.28 | 2.64 | 1.96        | 1.38 | 2.79 |
|                  | Male vs. Female                                           | 1.68                           | 1.31 | 2.16 | 1.67       | 1.30 | 2.16 | 1.72        | 1.35 | 2.20 | 1.68                                                 | 1.31 | 2.16 | 1.68       | 1.30 | 2.16 | 1.68        | 1.31 | 2.17 |
|                  | NHB vs. NHW                                               | 0.70                           | 0.54 | 0.93 | 0.80       | 0.61 | 1.06 | 0.81        | 0.61 | 1.07 | 0.70                                                 | 0.54 | 0.93 | 0.78       | 0.59 | 1.03 | 0.82        | 0.61 | 1.09 |
|                  | Mex. American vs. NHW                                     | 1.66                           | 1.28 | 2.16 | 1.63       | 1.23 | 2.16 | 1.69        | 1.29 | 2.22 | 1.66                                                 | 1.28 | 2.16 | 1.68       | 1.27 | 2.21 | 1.98        | 1.56 | 2.52 |
|                  | Other Races vs. NHW                                       | 1.34                           | 0.80 | 2.23 | 1.44       | 0.82 | 2.53 | 1.41        | 0.83 | 2.40 | 1.34                                                 | 0.80 | 2.23 | 1.42       | 0.80 | 2.52 | 1.43        | 0.84 | 2.44 |
|                  | HS* Grad vs. Less than HS                                 | 0.79                           | 0.60 | 1.03 | 0.95       | 0.72 | 1.27 | 0.92        | 0.71 | 1.19 | 0.79                                                 | 0.60 | 1.03 | 0.98       | 0.73 | 1.31 | .           | .    | .    |
|                  | More than HS vs. Less than HS                             | 0.61                           | 0.43 | 0.85 | 0.68       | 0.48 | 0.98 | 0.65        | 0.47 | 0.91 | 0.61                                                 | 0.43 | 0.85 | 0.72       | 0.50 | 1.05 | .           | .    | .    |
|                  | Not Married vs. Married                                   | 0.60                           | 0.47 | 0.75 | 0.68       | 0.52 | 0.88 | 0.69        | 0.54 | 0.89 | 0.60                                                 | 0.47 | 0.75 | 0.68       | 0.52 | 0.88 | 0.70        | 0.55 | 0.89 |
|                  | Poverty 100%-199% FPG vs. Less than 100% FPG              | 1.10                           | 0.76 | 1.58 | 1.05       | 0.71 | 1.56 | .           | .    | .    | 1.10                                                 | 0.76 | 1.58 | 1.04       | 0.69 | 1.54 | .           | .    | .    |
|                  | Poverty ≥200% FPG vs. Less than 100% FPG                  | 1.03                           | 0.77 | 1.37 | 0.91       | 0.68 | 1.20 | .           | .    | .    | 1.03                                                 | 0.77 | 1.37 | 0.91       | 0.69 | 1.21 | .           | .    | .    |
|                  | Former Smoker vs. Current Smoker                          | 1.53                           | 1.13 | 2.08 | 1.28       | 0.93 | 1.77 | .           | .    | .    | 1.53                                                 | 1.13 | 2.08 | 1.29       | 0.93 | 1.79 | .           | .    | .    |
|                  | Never Smoked vs. Current Smoker                           | 0.97                           | 0.74 | 1.28 | 1.09       | 0.82 | 1.45 | .           | .    | .    | 0.97                                                 | 0.74 | 1.28 | 1.11       | 0.84 | 1.48 | .           | .    | .    |
| Dental Variables | Less than 20 Permanent teeth Yes vs. No                   | .                              | .    | .    | .          | .    | .    | .           | .    | .    | 1.93                                                 | 1.48 | 2.52 | 1.35       | 1.00 | 1.81 | 1.50        | 1.11 | 2.02 |
|                  | Prevalence of moderate or severe Periodontitis Yes vs. No | .                              | .    | .    | .          | .    | .    | .           | .    | .    | .                                                    | .    | .    | .          | .    | .    | .           | .    | .    |
|                  | Prevalence of Caries Experience Yes vs. No                | .                              | .    | .    | .          | .    | .    | .           | .    | .    | .                                                    | .    | .    | .          | .    | .    | .           | .    | .    |
|                  | Prevalence of Untreated Caries Yes vs. No                 | .                              | .    | .    | .          | .    | .    | .           | .    | .    | .                                                    | .    | .    | .          | .    | .    | .           | .    | .    |

**Appendix Table 2b: Unadjusted, Adjusted and Final Logistic Regression Analysis with respect to the Ultrasonography (USON) Assessment of NAFLD, NHANES 1988-1994**

|                                 |                                                           | Model 3: Demo. and Periodontitis Variables |      |      |            |      |      |             |      |      | Model 4: Demo. and Caries Experience Variables |      |      |            |      |      |             |      |      |
|---------------------------------|-----------------------------------------------------------|--------------------------------------------|------|------|------------|------|------|-------------|------|------|------------------------------------------------|------|------|------------|------|------|-------------|------|------|
| Variable                        |                                                           | Crude Model                                |      |      | Full Model |      |      | Final Model |      |      | Crude Model                                    |      |      | Full Model |      |      | Final Model |      |      |
|                                 |                                                           | OR                                         | LCI  | UCI  | OR         | LCI  | UCI  | OR          | LCI  | UCI  | OR                                             | LCI  | UCI  | OR         | LCI  | UCI  | OR          | LCI  | UCI  |
| <b>Demo Variables</b>           | Age 40-59 years vs. 21-39 years                           | 1.98                                       | 1.49 | 2.62 | 1.82       | 1.38 | 2.40 | 1.84        | 1.40 | 2.42 | 1.98                                           | 1.49 | 2.62 | 1.83       | 1.38 | 2.43 | 1.92        | 1.46 | 2.54 |
|                                 | Age 60-74 years vs. 21-39 years                           | 2.20                                       | 1.61 | 3.02 | 2.01       | 1.45 | 2.78 | 2.09        | 1.50 | 2.90 | 2.20                                           | 1.61 | 3.02 | 2.04       | 1.47 | 2.82 | 2.18        | 1.61 | 2.97 |
|                                 | Male vs. Female                                           | 1.68                                       | 1.31 | 2.16 | 1.66       | 1.29 | 2.14 | 1.64        | 1.28 | 2.10 | 1.68                                           | 1.31 | 2.16 | 1.68       | 1.30 | 2.16 | 1.72        | 1.35 | 2.20 |
|                                 | NHB vs. NHW                                               | 0.70                                       | 0.54 | 0.93 | 0.76       | 0.56 | 1.03 | 0.81        | 0.60 | 1.10 | 0.70                                           | 0.54 | 0.93 | 0.81       | 0.61 | 1.07 | 0.81        | 0.61 | 1.07 |
|                                 | Mex. American vs. NHW                                     | 1.66                                       | 1.28 | 2.16 | 1.68       | 1.26 | 2.24 | 1.93        | 1.51 | 2.47 | 1.66                                           | 1.28 | 2.16 | 1.65       | 1.26 | 2.17 | 1.69        | 1.29 | 2.22 |
|                                 | Other Races vs. NHW                                       | 1.34                                       | 0.80 | 2.23 | 1.40       | 0.80 | 2.44 | 1.43        | 0.85 | 2.41 | 1.34                                           | 0.80 | 2.23 | 1.45       | 0.83 | 2.55 | 1.41        | 0.83 | 2.40 |
|                                 | HS Grad vs. Less than HS                                  | 0.79                                       | 0.60 | 1.03 | 0.99       | 0.74 | 1.33 | .           | .    | .    | 0.79                                           | 0.60 | 1.03 | 0.95       | 0.71 | 1.27 | 0.92        | 0.71 | 1.19 |
|                                 | More than HS vs. Less than HS                             | 0.61                                       | 0.43 | 0.85 | 0.74       | 0.50 | 1.09 | .           | .    | .    | 0.61                                           | 0.43 | 0.85 | 0.68       | 0.47 | 0.97 | 0.65        | 0.47 | 0.91 |
|                                 | Not Married vs. Married                                   | 0.60                                       | 0.47 | 0.75 | 0.68       | 0.52 | 0.88 | 0.70        | 0.54 | 0.89 | 0.60                                           | 0.47 | 0.75 | 0.68       | 0.52 | 0.88 | 0.69        | 0.54 | 0.89 |
|                                 | Poverty 100%-199% FPG vs. Less than 100% FPG              | 1.10                                       | 0.76 | 1.58 | 1.07       | 0.71 | 1.61 | .           | .    | .    | 1.10                                           | 0.76 | 1.58 | 1.04       | 0.70 | 1.54 | .           | .    | .    |
|                                 | Poverty ≥200% FPG vs. Less than 100% FPG                  | 1.03                                       | 0.77 | 1.37 | 0.94       | 0.71 | 1.26 | .           | .    | .    | 1.03                                           | 0.77 | 1.37 | 0.90       | 0.68 | 1.19 | .           | .    | .    |
|                                 | Former Smoker vs. Current Smoker                          | .                                          | .    | .    | .          | .    | .    | .           | .    | .    | 1.53                                           | 1.13 | 2.08 | 1.28       | 0.93 | 1.77 | .           | .    | .    |
| Never Smoked vs. Current Smoker | .                                                         | .                                          | .    | .    | .          | .    | .    | .           | .    | 0.97 | 0.74                                           | 1.28 | 1.09 | 0.82       | 1.45 | .    | .           | .    |      |
| <b>Dental Variables</b>         | Less than 20 Permanent teeth Yes vs. No                   | .                                          | .    | .    | .          | .    | .    | .           | .    | .    | .                                              | .    | .    | .          | .    | .    | .           | .    | .    |
|                                 | Prevalence of moderate or severe Periodontitis Yes vs. No | 2.01                                       | 1.35 | 2.99 | 1.45       | 0.95 | 2.21 | 1.54        | 1.06 | 2.24 | .                                              | .    | .    | .          | .    | .    | .           | .    | .    |
|                                 | Prevalence of Caries Experience Yes vs. No                | .                                          | .    | .    | .          | .    | .    | .           | .    | .    | 1.13                                           | 0.70 | 1.81 | 1.15       | 0.70 | 1.90 | .           | .    | .    |
|                                 | Prevalence of Untreated Caries Yes vs. No                 | .                                          | .    | .    | .          | .    | .    | .           | .    | .    | .                                              | .    | .    | .          | .    | .    | .           | .    | .    |

**Appendix Table 2c: Unadjusted, Adjusted and Final Logistic Regression Analysis with respect to the Ultrasonography (USON) Assessment of NAFLD, NHANES 1988-1994**

|                                                           |                                              | <b>Model 5: Demo. and Untreated Caries Variables</b> |            |            |                   |            |            |                    |            |            |
|-----------------------------------------------------------|----------------------------------------------|------------------------------------------------------|------------|------------|-------------------|------------|------------|--------------------|------------|------------|
|                                                           |                                              | <b>Crude Model</b>                                   |            |            | <b>Full Model</b> |            |            | <b>Final Model</b> |            |            |
| <b>Variable</b>                                           |                                              | <b>OR</b>                                            | <b>LCI</b> | <b>UCI</b> | <b>OR</b>         | <b>LCI</b> | <b>UCI</b> | <b>OR</b>          | <b>LCI</b> | <b>UCI</b> |
| <b>Demo Variables</b>                                     | Age 40-59 years vs. 21-39 years              | 1.98                                                 | 1.49       | 2.62       | 1.84              | 1.38       | 2.45       | 1.96               | 1.48       | 2.60       |
|                                                           | Age 60-74 years vs. 21-39 years              | 2.20                                                 | 1.61       | 3.02       | 2.07              | 1.50       | 2.86       | 2.31               | 1.69       | 3.17       |
|                                                           | Male vs. Female                              | 1.68                                                 | 1.31       | 2.16       | 1.64              | 1.27       | 2.13       | 1.65               | 1.27       | 2.13       |
|                                                           | NHB vs. NHW                                  | 0.70                                                 | 0.54       | 0.93       | 0.76              | 0.58       | 1.00       | 0.78               | 0.59       | 1.04       |
|                                                           | Mex. American vs. NHW                        | 1.66                                                 | 1.28       | 2.16       | 1.65              | 1.25       | 2.17       | 1.86               | 1.46       | 2.37       |
|                                                           | Other Races vs. NHW                          | 1.34                                                 | 0.80       | 2.23       | 1.45              | 0.82       | 2.58       | 1.47               | 0.86       | 2.52       |
|                                                           | HS Grad vs. Less than HS                     | 0.79                                                 | 0.60       | 1.03       | 0.99              | 0.74       | 1.32       | .                  | .          | .          |
|                                                           | More than HS vs. Less than HS                | 0.61                                                 | 0.43       | 0.85       | 0.74              | 0.51       | 1.08       | .                  | .          | .          |
|                                                           | Not Married vs. Married                      | 0.60                                                 | 0.47       | 0.75       | 0.68              | 0.52       | 0.88       | 0.68               | 0.53       | 0.88       |
|                                                           | Poverty 100%-199% FPG vs. Less than 100% FPG | 1.10                                                 | 0.76       | 1.58       | 1.04              | 0.70       | 1.54       | .                  | .          | .          |
|                                                           | Poverty ≥200% FPG vs. Less than 100% FPG     | 1.03                                                 | 0.77       | 1.37       | 0.95              | 0.71       | 1.27       | .                  | .          | .          |
|                                                           | Former Smoker vs. Current Smoker             | 1.53                                                 | 1.13       | 2.08       | 1.33              | 0.95       | 1.86       | .                  | .          | .          |
|                                                           | Never Smoked vs. Current Smoker              | 0.97                                                 | 0.74       | 1.28       | 1.13              | 0.84       | 1.51       | .                  | .          | .          |
|                                                           | <b>Dental Variables</b>                      | Less than 20 Permanent teeth Yes vs. No              | .          | .          | .                 | .          | .          | .                  | .          | .          |
| Prevalence of moderate or severe Periodontitis Yes vs. No |                                              | .                                                    | .          | .          | .                 | .          | .          | .                  | .          | .          |
| Prevalence of Caries Experience Yes vs. No                |                                              | .                                                    | .          | .          | .                 | .          | .          | .                  | .          | .          |
| Prevalence of Untreated Caries Yes vs. No                 |                                              | 1.41                                                 | 1.13       | 1.76       | 1.41              | 1.07       | 1.86       | 1.51               | 1.20       | 1.90       |

**Appendix Table 3a: Unadjusted, Adjusted and Final Logistic Regression Analysis with respect to the Fibrosis Score (FS), NHANES 1988-1994**

|                                 |                                                           | Model 1: Demographic Variables |      |      |            |      |      |             |      |      | Model 2: Demo. and Num. of Permanent Teeth Variables |      |      |            |      |      |             |      |      |
|---------------------------------|-----------------------------------------------------------|--------------------------------|------|------|------------|------|------|-------------|------|------|------------------------------------------------------|------|------|------------|------|------|-------------|------|------|
| Variable                        |                                                           | Crude Model                    |      |      | Full Model |      |      | Final Model |      |      | Crude Model                                          |      |      | Full Model |      |      | Final Model |      |      |
|                                 |                                                           | OR                             | LCI  | UCI  | OR         | LCI  | UCI  | OR          | LCI  | UCI  | OR                                                   | LCI  | UCI  | OR         | LCI  | UCI  | OR          | LCI  | UCI  |
| <b>Demo Variables</b>           | Male vs. Female                                           | 0.84                           | 0.68 | 1.03 | 0.79       | 0.63 | 0.99 | 0.79        | 0.63 | 1.00 | 0.84                                                 | 0.68 | 1.03 | 0.79       | 0.62 | 1.01 | .           | .    | .    |
|                                 | NHB vs. NHW                                               | 1.10                           | 0.90 | 1.34 | 1.22       | 0.95 | 1.56 | 1.17        | 0.94 | 1.45 | 1.10                                                 | 0.90 | 1.34 | 1.08       | 0.84 | 1.38 | 0.99        | 0.80 | 1.23 |
|                                 | Mex. American vs. NHW                                     | 0.53                           | 0.43 | 0.65 | 0.40       | 0.31 | 0.51 | 0.38        | 0.30 | 0.48 | 0.53                                                 | 0.43 | 0.65 | 0.49       | 0.39 | 0.62 | 0.48        | 0.38 | 0.60 |
|                                 | Other Races vs. NHW                                       | 0.66                           | 0.40 | 1.09 | 0.67       | 0.36 | 1.26 | 0.61        | 0.35 | 1.05 | 0.66                                                 | 0.40 | 1.09 | 0.62       | 0.34 | 1.13 | 0.55        | 0.32 | 0.92 |
|                                 | HS Grad vs. Less than HS                                  | 0.80                           | 0.60 | 1.06 | 0.64       | 0.48 | 0.86 | 0.63        | 0.47 | 0.85 | 0.80                                                 | 0.60 | 1.06 | 0.77       | 0.57 | 1.04 | 0.78        | 0.58 | 1.06 |
|                                 | More than HS vs. Less than HS                             | 0.55                           | 0.43 | 0.71 | 0.41       | 0.30 | 0.58 | 0.40        | 0.30 | 0.54 | 0.55                                                 | 0.43 | 0.71 | 0.58       | 0.42 | 0.81 | 0.57        | 0.43 | 0.75 |
|                                 | Not Married vs. Married                                   | 0.75                           | 0.61 | 0.93 | 0.74       | 0.59 | 0.94 | 0.76        | 0.61 | 0.95 | 0.75                                                 | 0.61 | 0.93 | 0.78       | 0.61 | 0.98 | .           | .    | .    |
|                                 | Poverty 100%-199% FPG vs. Less than 100% FPG              | 1.10                           | 0.73 | 1.66 | 1.05       | 0.68 | 1.61 | .           | .    | .    | 1.10                                                 | 0.73 | 1.66 | 0.99       | 0.62 | 1.57 | .           | .    | .    |
|                                 | Poverty ≥200% FPG vs. Less than 100% FPG                  | 1.07                           | 0.80 | 1.43 | 1.05       | 0.76 | 1.46 | .           | .    | .    | 1.07                                                 | 0.80 | 1.43 | 1.01       | 0.72 | 1.43 | .           | .    | .    |
|                                 | Former Smoker vs. Current Smoker                          | 2.30                           | 1.75 | 3.03 | 2.76       | 2.07 | 3.67 | 2.78        | 2.09 | 3.70 | 2.30                                                 | 1.75 | 3.03 | 2.69       | 2.02 | 3.58 | 2.71        | 2.00 | 3.67 |
| Never Smoked vs. Current Smoker | 1.24                                                      | 0.88                           | 1.75 | 1.48 | 1.04       | 2.13 | 1.52 | 1.07        | 2.18 | 1.24 | 0.88                                                 | 1.75 | 1.62 | 1.12       | 2.34 | 1.72 | 1.18        | 2.49 |      |
| <b>Dental Variables</b>         | Less than 20 Permanent teeth Yes vs. No                   | .                              | .    | .    | .          | .    | .    | .           | .    | .    | 4.88                                                 | 3.86 | 6.17 | 4.49       | 3.46 | 5.82 | 4.36        | 3.47 | 5.49 |
|                                 | Prevalence of moderate or severe Periodontitis Yes vs. No | .                              | .    | .    | .          | .    | .    | .           | .    | .    | .                                                    | .    | .    | .          | .    | .    | .           | .    | .    |
|                                 | Prevalence of Caries Experience Yes vs. No                | .                              | .    | .    | .          | .    | .    | .           | .    | .    | .                                                    | .    | .    | .          | .    | .    | .           | .    | .    |
|                                 | Prevalence of Untreated Caries Yes vs. No                 | .                              | .    | .    | .          | .    | .    | .           | .    | .    | .                                                    | .    | .    | .          | .    | .    | .           | .    | .    |

**Appendix Table 3b: Unadjusted, Adjusted and Final Logistic Regression Analysis with respect to the  
Fibrosis Score (FS), NHANES 1988-1994**

|                         |                                                           | Model 3: Demo. and Periodontitis Variables |      |      |            |      |      |             |      |      | Model 4: Demo. and Caries Experience Variables |      |      |            |      |      |             |      |      |
|-------------------------|-----------------------------------------------------------|--------------------------------------------|------|------|------------|------|------|-------------|------|------|------------------------------------------------|------|------|------------|------|------|-------------|------|------|
| Variable                |                                                           | Crude Model                                |      |      | Full Model |      |      | Final Model |      |      | Crude Model                                    |      |      | Full Model |      |      | Final Model |      |      |
|                         |                                                           | OR                                         | LCI  | UCI  | OR         | LCI  | UCI  | OR          | LCI  | UCI  | OR                                             | LCI  | UCI  | OR         | LCI  | UCI  | OR          | LCI  | UCI  |
| <b>Demo Variables</b>   | Male vs. Female                                           | 0.84                                       | 0.68 | 1.03 | 0.75       | 0.59 | 0.94 | 0.75        | 0.59 | 0.96 | 0.84                                           | 0.68 | 1.03 | 0.79       | 0.63 | 0.99 | 0.79        | 0.63 | 1.00 |
|                         | NHB vs. NHW                                               | 1.10                                       | 0.90 | 1.34 | 1.11       | 0.87 | 1.41 | 1.05        | 0.84 | 1.30 | 1.10                                           | 0.90 | 1.34 | 1.23       | 0.97 | 1.57 | 1.17        | 0.94 | 1.45 |
|                         | Mex. American vs. NHW                                     | 0.53                                       | 0.43 | 0.65 | 0.41       | 0.33 | 0.52 | 0.39        | 0.31 | 0.49 | 0.53                                           | 0.43 | 0.65 | 0.41       | 0.32 | 0.52 | 0.38        | 0.30 | 0.48 |
|                         | Other Races vs. NHW                                       | 0.66                                       | 0.40 | 1.09 | 0.64       | 0.33 | 1.23 | 0.58        | 0.33 | 1.02 | 0.66                                           | 0.40 | 1.09 | 0.68       | 0.36 | 1.26 | 0.61        | 0.35 | 1.05 |
|                         | HS Grad vs. Less than HS                                  | 0.80                                       | 0.60 | 1.06 | 0.71       | 0.53 | 0.95 | 0.70        | 0.53 | 0.94 | 0.80                                           | 0.60 | 1.06 | 0.64       | 0.48 | 0.85 | 0.63        | 0.47 | 0.85 |
|                         | More than HS vs. Less than HS                             | 0.55                                       | 0.43 | 0.71 | 0.48       | 0.34 | 0.67 | 0.46        | 0.34 | 0.62 | 0.55                                           | 0.43 | 0.71 | 0.41       | 0.29 | 0.57 | 0.40        | 0.30 | 0.54 |
|                         | Not Married vs. Married                                   | 0.75                                       | 0.61 | 0.93 | 0.76       | 0.61 | 0.96 | 0.78        | 0.63 | 0.96 | 0.75                                           | 0.61 | 0.93 | 0.74       | 0.59 | 0.94 | 0.76        | 0.61 | 0.95 |
|                         | Poverty 100%-199% FPG vs. Less than 100% FPG              | 1.10                                       | 0.73 | 1.66 | 1.10       | 0.71 | 1.71 | .           | .    | .    | 1.10                                           | 0.73 | 1.66 | 1.03       | 0.67 | 1.58 | .           | .    | .    |
|                         | Poverty ≥200% FPG vs. Less than 100% FPG                  | 1.07                                       | 0.80 | 1.43 | 1.11       | 0.80 | 1.54 | .           | .    | .    | 1.07                                           | 0.80 | 1.43 | 1.04       | 0.76 | 1.43 | .           | .    | .    |
|                         | Former Smoker vs. Current Smoker                          | 2.30                                       | 1.75 | 3.03 | 3.01       | 2.24 | 4.04 | 3.06        | 2.29 | 4.09 | 2.30                                           | 1.75 | 3.03 | 2.76       | 2.07 | 3.67 | 2.78        | 2.09 | 3.70 |
|                         | Never Smoked vs. Current Smoker                           | 1.24                                       | 0.88 | 1.75 | 1.69       | 1.16 | 2.47 | 1.75        | 1.20 | 2.55 | 1.24                                           | 0.88 | 1.75 | 1.49       | 1.03 | 2.13 | 1.52        | 1.07 | 2.18 |
| <b>Dental Variables</b> | Less than 20 Permanent teeth Yes vs. No                   | .                                          | .    | .    | .          | .    | .    | .           | .    | .    | .                                              | .    | .    | .          | .    | .    | .           | .    | .    |
|                         | Prevalence of moderate or severe Periodontitis Yes vs. No | 3.00                                       | 2.32 | 3.89 | 3.03       | 2.24 | 4.11 | 3.10        | 2.31 | 4.17 | .                                              | .    | .    | .          | .    | .    | .           | .    | .    |
|                         | Prevalence of Caries Experience Yes vs. No                | .                                          | .    | .    | .          | .    | .    | .           | .    | .    | 1.40                                           | 0.91 | 2.15 | 1.29       | 0.83 | 2.02 | .           | .    | .    |
|                         | Prevalence of Untreated Caries Yes vs. No                 | .                                          | .    | .    | .          | .    | .    | .           | .    | .    | .                                              | .    | .    | .          | .    | .    | .           | .    | .    |

**Appendix Table 3c: Unadjusted, Adjusted and Final Logistic Regression Analysis with respect to the Fibrosis Score (FS), NHANES 1988-1994**

|                         |                                                           | <b>Model 5: Demo. and Untreated Caries Variables</b> |            |            |                   |            |            |                    |            |            |
|-------------------------|-----------------------------------------------------------|------------------------------------------------------|------------|------------|-------------------|------------|------------|--------------------|------------|------------|
|                         |                                                           | <b>Crude Model</b>                                   |            |            | <b>Full Model</b> |            |            | <b>Final Model</b> |            |            |
| <b>Variable</b>         |                                                           | <b>OR</b>                                            | <b>LCI</b> | <b>UCI</b> | <b>OR</b>         | <b>LCI</b> | <b>UCI</b> | <b>OR</b>          | <b>LCI</b> | <b>UCI</b> |
| <b>Demo Variables</b>   | Male vs. Female                                           | 0.84                                                 | 0.68       | 1.03       | 0.78              | 0.62       | 0.97       | 0.79               | 0.63       | 1.00       |
|                         | NHB vs. NHW                                               | 1.10                                                 | 0.90       | 1.34       | 1.18              | 0.91       | 1.53       | 1.17               | 0.94       | 1.45       |
|                         | Mex. American vs. NHW                                     | 0.53                                                 | 0.43       | 0.65       | 0.40              | 0.31       | 0.51       | 0.38               | 0.30       | 0.48       |
|                         | Other Races vs. NHW                                       | 0.66                                                 | 0.40       | 1.09       | 0.67              | 0.36       | 1.26       | 0.61               | 0.35       | 1.05       |
|                         | HS Grad vs. Less than HS                                  | 0.80                                                 | 0.60       | 1.06       | 0.66              | 0.49       | 0.88       | 0.63               | 0.47       | 0.85       |
|                         | More than HS vs. Less than HS                             | 0.55                                                 | 0.43       | 0.71       | 0.43              | 0.31       | 0.60       | 0.40               | 0.30       | 0.54       |
|                         | Not Married vs. Married                                   | 0.75                                                 | 0.61       | 0.93       | 0.74              | 0.58       | 0.95       | 0.76               | 0.61       | 0.95       |
|                         | Poverty 100%-199% FPG vs. Less than 100% FPG              | 1.10                                                 | 0.73       | 1.66       | 1.04              | 0.68       | 1.60       | .                  | .          | .          |
|                         | Poverty ≥200% FPG vs. Less than 100% FPG                  | 1.07                                                 | 0.80       | 1.43       | 1.09              | 0.77       | 1.54       | .                  | .          | .          |
|                         | Former Smoker vs. Current Smoker                          | 2.30                                                 | 1.75       | 3.03       | 2.82              | 2.12       | 3.75       | 2.78               | 2.09       | 3.70       |
|                         | Never Smoked vs. Current Smoker                           | 1.24                                                 | 0.88       | 1.75       | 1.52              | 1.06       | 2.17       | 1.52               | 1.07       | 2.18       |
| <b>Dental Variables</b> | Less than 20 Permanent teeth Yes vs. No                   | .                                                    | .          | .          | .                 | .          | .          | .                  | .          | .          |
|                         | Prevalence of moderate or severe Periodontitis Yes vs. No | .                                                    | .          | .          | .                 | .          | .          | .                  | .          | .          |
|                         | Prevalence of Caries Experience Yes vs. No                | .                                                    | .          | .          | .                 | .          | .          | .                  | .          | .          |
|                         | Prevalence of Untreated Caries Yes vs. No                 | 1.27                                                 | 1.00       | 1.62       | 1.21              | 0.92       | 1.59       | .                  | .          | .          |



**Appendix Table 4a: Unadjusted, Adjusted and Final Logistic Regression Analysis respect to the Fatty Liver Index (FLI) Assessment of NAFLD, NHANES 1988-1994**

|                         | Variable                                                  | Model 1: Demographic Variables |      |      |            |      |      |             |      |      | Model 2: Demo. and Num. of Permanent Teeth Variables |      |      |            |      |      |             |      |      |
|-------------------------|-----------------------------------------------------------|--------------------------------|------|------|------------|------|------|-------------|------|------|------------------------------------------------------|------|------|------------|------|------|-------------|------|------|
|                         |                                                           | Crude Model                    |      |      | Full Model |      |      | Final Model |      |      | Crude Model                                          |      |      | Full Model |      |      | Final Model |      |      |
|                         |                                                           | OR                             | LCI  | UCI  | OR         | LCI  | UCI  | OR          | LCI  | UCI  | OR                                                   | LCI  | UCI  | OR         | LCI  | UCI  | OR          | LCI  | UCI  |
| <b>Demo Variables</b>   | Male vs. Female                                           | 1.88                           | 1.49 | 2.39 | 1.93       | 1.50 | 2.48 | 1.83        | 1.43 | 2.34 | 1.88                                                 | 1.49 | 2.39 | 1.93       | 1.49 | 2.50 | 1.81        | 1.42 | 2.31 |
|                         | NHB vs. NHW                                               | 1.17                           | 0.94 | 1.46 | 1.26       | 1.01 | 1.57 | 1.38        | 1.12 | 1.70 | 1.17                                                 | 0.94 | 1.46 | 1.18       | 0.94 | 1.48 | .           | .    | .    |
|                         | Mex. American vs. NHW                                     | 1.27                           | 0.98 | 1.66 | 1.00       | 0.73 | 1.38 | 1.06        | 0.79 | 1.41 | 1.27                                                 | 0.98 | 1.66 | 1.10       | 0.81 | 1.49 | .           | .    | .    |
|                         | Other Races vs. NHW                                       | 0.73                           | 0.46 | 1.15 | 0.81       | 0.49 | 1.32 | 0.74        | 0.45 | 1.21 | 0.73                                                 | 0.46 | 1.15 | 0.79       | 0.47 | 1.33 | .           | .    | .    |
|                         | HS Grad vs. Less than HS                                  | 0.74                           | 0.59 | 0.91 | 0.76       | 0.60 | 0.97 | 0.71        | 0.56 | 0.90 | 0.74                                                 | 0.59 | 0.91 | 0.82       | 0.64 | 1.06 | 0.77        | 0.61 | 0.98 |
|                         | More than HS vs. Less than HS                             | 0.53                           | 0.41 | 0.70 | 0.54       | 0.41 | 0.72 | 0.49        | 0.37 | 0.64 | 0.53                                                 | 0.41 | 0.70 | 0.63       | 0.47 | 0.84 | 0.55        | 0.42 | 0.73 |
|                         | Not Married vs. Married                                   | 0.67                           | 0.51 | 0.87 | 0.65       | 0.49 | 0.86 | 0.69        | 0.53 | 0.90 | 0.67                                                 | 0.51 | 0.87 | 0.67       | 0.51 | 0.89 | 0.73        | 0.56 | 0.96 |
|                         | Poverty 100%-199% FPG vs. Less than 100% FPG              | 1.01                           | 0.68 | 1.49 | 0.96       | 0.62 | 1.48 | .           | .    | .    | 1.01                                                 | 0.68 | 1.49 | 0.93       | 0.60 | 1.45 | .           | .    | .    |
|                         | Poverty ≥200% FPG vs. Less than 100% FPG                  | 0.80                           | 0.59 | 1.09 | 0.74       | 0.51 | 1.08 | .           | .    | .    | 0.80                                                 | 0.59 | 1.09 | 0.72       | 0.49 | 1.06 | .           | .    | .    |
|                         | Former Smoker vs. Current Smoker                          | 1.56                           | 1.04 | 2.33 | 1.80       | 1.17 | 2.78 | 1.67        | 1.09 | 2.55 | 1.56                                                 | 1.04 | 2.33 | 1.75       | 1.14 | 2.70 | 1.61        | 1.05 | 2.46 |
|                         | Never Smoked vs. Current Smoker                           | 0.78                           | 0.60 | 1.02 | 1.06       | 0.78 | 1.44 | 0.98        | 0.74 | 1.30 | 0.78                                                 | 0.60 | 1.02 | 1.09       | 0.81 | 1.47 | 0.99        | 0.76 | 1.30 |
| <b>Dental Variables</b> | Less than 20 Permanent teeth Yes vs. No                   | .                              | .    | .    | .          | .    | .    | .           | .    | .    | 2.43                                                 | 1.88 | 3.14 | 2.04       | 1.51 | 2.77 | 1.99        | 1.52 | 2.59 |
|                         | Prevalence of moderate or severe Periodontitis Yes vs. No | .                              | .    | .    | .          | .    | .    | .           | .    | .    | .                                                    | .    | .    | .          | .    | .    | .           | .    | .    |
|                         | Prevalence of Caries Experience Yes vs. No                | .                              | .    | .    | .          | .    | .    | .           | .    | .    | .                                                    | .    | .    | .          | .    | .    | .           | .    | .    |
|                         | Prevalence of Untreated Caries Yes vs. No                 | .                              | .    | .    | .          | .    | .    | .           | .    | .    | .                                                    | .    | .    | .          | .    | .    | .           | .    | .    |

**Appendix Table 4b: Unadjusted, Adjusted and Final Logistic Regression Analysis respect to the Fatty Liver Index (FLI) Assessment of NAFLD, NHANES 1988-1994**

|                                 |                                                           | Model 3: Demo. and Periodontitis Variables |      |      |            |      |      |             |      |      | Model 4: Demo. and Caries Experience Variables |      |      |            |      |      |             |      |      |
|---------------------------------|-----------------------------------------------------------|--------------------------------------------|------|------|------------|------|------|-------------|------|------|------------------------------------------------|------|------|------------|------|------|-------------|------|------|
|                                 |                                                           | Crude Model                                |      |      | Full Model |      |      | Final Model |      |      | Crude Model                                    |      |      | Full Model |      |      | Final Model |      |      |
| Variable                        |                                                           | OR                                         | LCI  | UCI  | OR         | LCI  | UCI  | OR          | LCI  | UCI  | OR                                             | LCI  | UCI  | OR         | LCI  | UCI  | OR          | LCI  | UCI  |
| <b>Demo Variables</b>           | Male vs. Female                                           | 1.88                                       | 1.49 | 2.39 | 1.90       | 1.48 | 2.44 | 1.78        | 1.41 | 2.25 | 1.88                                           | 1.49 | 2.39 | 1.93       | 1.50 | 2.48 | 1.83        | 1.43 | 2.34 |
|                                 | NHB vs. NHW                                               | 1.17                                       | 0.94 | 1.46 | 1.22       | 0.97 | 1.54 | .           | .    | .    | 1.17                                           | 0.94 | 1.46 | 1.25       | 1.01 | 1.55 | 1.38        | 1.12 | 1.70 |
|                                 | Mex. American vs. NHW                                     | 1.27                                       | 0.98 | 1.66 | 1.02       | 0.75 | 1.40 | .           | .    | .    | 1.27                                           | 0.98 | 1.66 | 0.99       | 0.71 | 1.37 | 1.06        | 0.79 | 1.41 |
|                                 | Other Races vs. NHW                                       | 0.73                                       | 0.46 | 1.15 | 0.79       | 0.48 | 1.28 | .           | .    | .    | 0.73                                           | 0.46 | 1.15 | 0.80       | 0.49 | 1.32 | 0.74        | 0.45 | 1.21 |
|                                 | HS Grad vs. Less than HS                                  | 0.74                                       | 0.59 | 0.91 | 0.79       | 0.61 | 1.02 | 0.75        | 0.59 | 0.96 | 0.74                                           | 0.59 | 0.91 | 0.77       | 0.60 | 0.98 | 0.71        | 0.56 | 0.90 |
|                                 | More than HS vs. Less than HS                             | 0.53                                       | 0.41 | 0.70 | 0.57       | 0.43 | 0.76 | 0.51        | 0.39 | 0.68 | 0.53                                           | 0.41 | 0.70 | 0.54       | 0.41 | 0.72 | 0.49        | 0.37 | 0.64 |
|                                 | Not Married vs. Married                                   | 0.67                                       | 0.51 | 0.87 | 0.66       | 0.50 | 0.88 | 0.72        | 0.55 | 0.95 | 0.67                                           | 0.51 | 0.87 | 0.65       | 0.49 | 0.86 | 0.69        | 0.53 | 0.90 |
|                                 | Poverty 100%-199% FPG vs. Less than 100% FPG              | 1.01                                       | 0.68 | 1.49 | 0.97       | 0.63 | 1.49 | .           | .    | .    | 1.01                                           | 0.68 | 1.49 | 0.97       | 0.62 | 1.51 | .           | .    | .    |
|                                 | Poverty ≥200% FPG vs. Less than 100% FPG                  | 0.80                                       | 0.59 | 1.09 | 0.75       | 0.52 | 1.09 | .           | .    | .    | 0.80                                           | 0.59 | 1.09 | 0.75       | 0.51 | 1.09 | .           | .    | .    |
|                                 | Former Smoker vs. Current Smoker                          | 1.56                                       | 1.04 | 2.33 | 1.83       | 1.18 | 2.84 | 1.70        | 1.10 | 2.62 | 1.56                                           | 1.04 | 2.33 | 1.81       | 1.17 | 2.78 | 1.67        | 1.09 | 2.55 |
| Never Smoked vs. Current Smoker | 0.78                                                      | 0.60                                       | 1.02 | 1.09 | 0.81       | 1.48 | 1.00 | 0.76        | 1.33 | 0.78 | 0.60                                           | 1.02 | 1.06 | 0.78       | 1.45 | 0.98 | 0.74        | 1.30 |      |
| <b>Dental Variables</b>         | Less than 20 Permanent teeth Yes vs. No                   | .                                          | .    | .    | .          | .    | .    | .           | .    | .    | .                                              | .    | .    | .          | .    | .    | .           | .    | .    |
|                                 | Prevalence of moderate or severe Periodontitis Yes vs. No | 1.99                                       | 1.41 | 2.81 | 1.45       | 0.97 | 2.17 | 1.61        | 1.13 | 2.28 | .                                              | .    | .    | .          | .    | .    | .           | .    | .    |
|                                 | Prevalence of Caries Experience Yes vs. No                | .                                          | .    | .    | .          | .    | .    | .           | .    | .    | 0.83                                           | 0.56 | 1.23 | 0.90       | 0.59 | 1.37 | .           | .    | .    |
|                                 | Prevalence of Untreated Caries Yes vs. No                 | .                                          | .    | .    | .          | .    | .    | .           | .    | .    | .                                              | .    | .    | .          | .    | .    | .           | .    | .    |

**Appendix Table 4c: Unadjusted, Adjusted and Final Logistic Regression Analysis respect to the Fatty Liver Index (FLI) Assessment of NAFLD, NHANES 1988-1994**

|                         |                                                           | <b>Model 5: Demo. and Untreated Caries Variables</b> |            |            |                   |            |            |                    |            |            |
|-------------------------|-----------------------------------------------------------|------------------------------------------------------|------------|------------|-------------------|------------|------------|--------------------|------------|------------|
|                         |                                                           | <b>Crude Model</b>                                   |            |            | <b>Full Model</b> |            |            | <b>Final Model</b> |            |            |
| <b>Variable</b>         |                                                           | <b>OR</b>                                            | <b>LCI</b> | <b>UCI</b> | <b>OR</b>         | <b>LCI</b> | <b>UCI</b> | <b>OR</b>          | <b>LCI</b> | <b>UCI</b> |
| <b>Demo Variables</b>   | Male vs. Female                                           | 1.88                                                 | 1.49       | 2.39       | 1.88              | 1.45       | 2.44       | 1.77               | 1.38       | 2.26       |
|                         | NHB vs. NHW                                               | 1.17                                                 | 0.94       | 1.46       | 1.15              | 0.90       | 1.48       | .                  | .          | .          |
|                         | Mex. American vs. NHW                                     | 1.27                                                 | 0.98       | 1.66       | 1.03              | 0.74       | 1.42       | .                  | .          | .          |
|                         | Other Races vs. NHW                                       | 0.73                                                 | 0.46       | 1.15       | 0.82              | 0.50       | 1.35       | .                  | .          | .          |
|                         | HS Grad vs. Less than HS                                  | 0.74                                                 | 0.59       | 0.91       | 0.81              | 0.64       | 1.03       | 0.79               | 0.63       | 0.99       |
|                         | More than HS vs. Less than HS                             | 0.53                                                 | 0.41       | 0.70       | 0.62              | 0.46       | 0.82       | 0.58               | 0.45       | 0.76       |
|                         | Not Married vs. Married                                   | 0.67                                                 | 0.51       | 0.87       | 0.65              | 0.49       | 0.85       | 0.68               | 0.53       | 0.88       |
|                         | Poverty 100%-199% FPG vs. Less than 100% FPG              | 1.01                                                 | 0.68       | 1.49       | 0.93              | 0.60       | 1.44       | .                  | .          | .          |
|                         | Poverty ≥200% FPG vs. Less than 100% FPG                  | 0.80                                                 | 0.59       | 1.09       | 0.80              | 0.56       | 1.15       | .                  | .          | .          |
|                         | Former Smoker vs. Current Smoker                          | 1.56                                                 | 1.04       | 2.33       | 1.92              | 1.22       | 3.01       | 1.79               | 1.14       | 2.79       |
|                         | Never Smoked vs. Current Smoker                           | 0.78                                                 | 0.60       | 1.02       | 1.13              | 0.82       | 1.55       | 1.04               | 0.78       | 1.38       |
| <b>Dental Variables</b> | Less than 20 Permanent teeth Yes vs. No                   | .                                                    | .          | .          | .                 | .          | .          | .                  | .          | .          |
|                         | Prevalence of moderate or severe Periodontitis Yes vs. No | .                                                    | .          | .          | .                 | .          | .          | .                  | .          | .          |
|                         | Prevalence of Caries Experience Yes vs. No                | .                                                    | .          | .          | .                 | .          | .          | .                  | .          | .          |
|                         | Prevalence of Untreated Caries Yes vs. No                 | 1.95                                                 | 1.47       | 2.58       | 1.70              | 1.23       | 2.35       | 1.80               | 1.33       | 2.44       |

**Appendix Table 5a: Unadjusted, Adjusted and Final Logistic Regression Analysis with respect to the U.S. Fatty Liver Index (US-FLI) Assessment of NAFLD, NHANES 1988-1994**

|                         |                                                           | Model 1: Demographic Variables |      |      |            |      |      |             |      |      | Model 2: Demo. and Num. of Permanent Teeth Variables |      |      |            |      |      |             |      |      |
|-------------------------|-----------------------------------------------------------|--------------------------------|------|------|------------|------|------|-------------|------|------|------------------------------------------------------|------|------|------------|------|------|-------------|------|------|
| Variable                |                                                           | Crude Model                    |      |      | Full Model |      |      | Final Model |      |      | Crude Model                                          |      |      | Full Model |      |      | Final Model |      |      |
|                         |                                                           | OR                             | LCI  | UCI  | OR         | LCI  | UCI  | OR          | LCI  | UCI  | OR                                                   | LCI  | UCI  | OR         | LCI  | UCI  | OR          | LCI  | UCI  |
| <b>Demo Variables</b>   | Male vs. Female                                           | 2.00                           | 1.59 | 2.52 | 1.99       | 1.54 | 2.57 | 1.89        | 1.50 | 2.38 | 2.00                                                 | 1.59 | 2.52 | 1.98       | 1.54 | 2.55 | 1.89        | 1.51 | 2.36 |
|                         | HS Grad vs. Less than HS                                  | 0.81                           | 0.60 | 1.11 | 0.96       | 0.66 | 1.38 | 0.81        | 0.57 | 1.16 | 0.81                                                 | 0.60 | 1.11 | 0.99       | 0.68 | 1.45 | 0.85        | 0.59 | 1.22 |
|                         | More than HS vs. Less than HS                             | 0.44                           | 0.31 | 0.63 | 0.46       | 0.29 | 0.75 | 0.38        | 0.24 | 0.59 | 0.44                                                 | 0.31 | 0.63 | 0.53       | 0.32 | 0.87 | 0.43        | 0.27 | 0.69 |
|                         | Not Married vs. Married                                   | 0.62                           | 0.49 | 0.80 | 0.64       | 0.48 | 0.85 | 0.67        | 0.52 | 0.87 | 0.62                                                 | 0.49 | 0.80 | 0.65       | 0.49 | 0.86 | 0.69        | 0.53 | 0.90 |
|                         | Poverty 100%-199% FPG vs. Less than 100% FPG              | 1.19                           | 0.79 | 1.79 | 1.10       | 0.68 | 1.79 | .           | .    | .    | 1.19                                                 | 0.79 | 1.79 | 1.08       | 0.67 | 1.75 | .           | .    | .    |
|                         | Poverty ≥200% FPG vs. Less than 100% FPG                  | 0.83                           | 0.55 | 1.26 | 0.79       | 0.47 | 1.33 | .           | .    | .    | 0.83                                                 | 0.55 | 1.26 | 0.77       | 0.46 | 1.30 | .           | .    | .    |
|                         | Former Smoker vs. Current Smoker                          | 2.46                           | 1.67 | 3.63 | 3.15       | 2.00 | 4.98 | 2.84        | 1.90 | 4.27 | 2.46                                                 | 1.67 | 3.63 | 3.12       | 1.96 | 4.99 | 2.79        | 1.85 | 4.21 |
|                         | Never Smoked vs. Current Smoker                           | 0.92                           | 0.63 | 1.34 | 1.44       | 0.94 | 2.20 | 1.26        | 0.85 | 1.88 | 0.92                                                 | 0.63 | 1.34 | 1.52       | 1.00 | 2.31 | 1.33        | 0.91 | 1.96 |
| <b>Dental Variables</b> | Less than 20 Permanent teeth Yes vs. No                   | .                              | .    | .    | .          | .    | .    | .           | .    | .    | 2.95                                                 | 2.28 | 3.82 | 2.24       | 1.74 | 2.88 | 2.32        | 1.79 | 3.01 |
|                         | Prevalence of moderate or severe Periodontitis Yes vs. No | .                              | .    | .    | .          | .    | .    | .           | .    | .    | .                                                    | .    | .    | .          | .    | .    | .           | .    | .    |
|                         | Prevalence of Caries Experience Yes vs. No                | .                              | .    | .    | .          | .    | .    | .           | .    | .    | .                                                    | .    | .    | .          | .    | .    | .           | .    | .    |
|                         | Prevalence of Untreated Caries Yes vs. No                 | .                              | .    | .    | .          | .    | .    | .           | .    | .    | .                                                    | .    | .    | .          | .    | .    | .           | .    | .    |

**Appendix Table 5b: Unadjusted, Adjusted and Final Logistic Regression Analysis with respect to the U.S. Fatty Liver Index (US-FLI) Assessment of NAFLD, NHANES 1988-1994**

|                         |                                                           | Model 3: Demo. and Periodontitis Variables |      |      |            |      |      |             |      |      | Model 4: Demo. and Caries Exp. Variables |      |      |            |      |      |             |      |      |
|-------------------------|-----------------------------------------------------------|--------------------------------------------|------|------|------------|------|------|-------------|------|------|------------------------------------------|------|------|------------|------|------|-------------|------|------|
|                         |                                                           | Crude Model                                |      |      | Full Model |      |      | Final Model |      |      | Crude Model                              |      |      | Full Model |      |      | Final Model |      |      |
| Variable                |                                                           | OR                                         | LCI  | UCI  | OR         | LCI  | UCI  | OR          | LCI  | UCI  | OR                                       | LCI  | UCI  | OR         | LCI  | UCI  | OR          | LCI  | UCI  |
| <b>Demo Variables</b>   | Male vs. Female                                           | 2.00                                       | 1.59 | 2.52 | 1.92       | 1.47 | 2.50 | 1.83        | 1.44 | 2.31 | 2.00                                     | 1.59 | 2.52 | 1.99       | 1.55 | 2.57 | 1.89        | 1.50 | 2.38 |
|                         | HS Grad vs. Less than HS                                  | 0.81                                       | 0.60 | 1.11 | 1.04       | 0.71 | 1.52 | 0.89        | 0.61 | 1.28 | 0.81                                     | 0.60 | 1.11 | 0.95       | 0.66 | 1.37 | 0.81        | 0.57 | 1.16 |
|                         | More than HS vs. Less than Hs                             | 0.44                                       | 0.31 | 0.63 | 0.52       | 0.32 | 0.84 | 0.42        | 0.27 | 0.66 | 0.44                                     | 0.31 | 0.63 | 0.46       | 0.29 | 0.75 | 0.38        | 0.24 | 0.59 |
|                         | Not Married vs. Married                                   | 0.62                                       | 0.49 | 0.80 | 0.65       | 0.48 | 0.88 | 0.68        | 0.52 | 0.89 | 0.62                                     | 0.49 | 0.80 | 0.64       | 0.48 | 0.85 | 0.67        | 0.52 | 0.87 |
|                         | Poverty 100%-199% FPG vs. Less than 100% FPG              | 1.19                                       | 0.79 | 1.79 | 1.14       | 0.69 | 1.87 | .           | .    | .    | 1.19                                     | 0.79 | 1.79 | 1.09       | 0.67 | 1.79 | .           | .    | .    |
|                         | Poverty ≥200% FPG vs. Less than 100% FPG                  | 0.83                                       | 0.55 | 1.26 | 0.82       | 0.48 | 1.42 | .           | .    | .    | 0.83                                     | 0.55 | 1.26 | 0.78       | 0.46 | 1.32 | .           | .    | .    |
|                         | Former Smoker vs. Current Smoker                          | 2.46                                       | 1.67 | 3.63 | 3.33       | 2.07 | 5.35 | 3.05        | 2.00 | 4.65 | 2.46                                     | 1.67 | 3.63 | 3.15       | 1.99 | 4.98 | 2.84        | 1.90 | 4.27 |
|                         | Never Smoked vs. Current Smoker                           | 0.92                                       | 0.63 | 1.34 | 1.56       | 1.04 | 2.33 | 1.39        | 0.94 | 2.04 | 0.92                                     | 0.63 | 1.34 | 1.44       | 0.94 | 2.20 | 1.26        | 0.85 | 1.88 |
| <b>Dental Variables</b> | Less than 20 Permanent teeth Yes vs. No                   | .                                          | .    | .    | .          | .    | .    | .           | .    | .    | .                                        | .    | .    | .          | .    | .    | .           | .    | .    |
|                         | Prevalence of moderate or severe Periodontitis Yes vs. No | 2.61                                       | 1.99 | 3.43 | 2.16       | 1.51 | 3.08 | 2.21        | 1.64 | 2.98 | .                                        | .    | .    | .          | .    | .    | .           | .    | .    |
|                         | Prevalence of Caries Experience Yes vs. No                | .                                          | .    | .    | .          | .    | .    | .           | .    | .    | 1.08                                     | 0.71 | 1.63 | 1.08       | 0.70 | 1.67 | .           | .    | .    |
|                         | Prevalence of Untreated Caries Yes vs. No                 | .                                          | .    | .    | .          | .    | .    | .           | .    | .    | .                                        | .    | .    | .          | .    | .    | .           | .    | .    |

**Appendix Table 5c: Unadjusted, Adjusted and Final Logistic Regression Analysis with respect to the U.S. Fatty Liver Index (US-FLI) Assessment of NAFLD, NHANES 1988-1994**

|                         |                                                           | <b>Model 5: Demo. and Untreated Caries Variables</b> |            |            |                   |            |            |                    |            |            |
|-------------------------|-----------------------------------------------------------|------------------------------------------------------|------------|------------|-------------------|------------|------------|--------------------|------------|------------|
|                         |                                                           | <b>Crude Model</b>                                   |            |            | <b>Full Model</b> |            |            | <b>Final Model</b> |            |            |
| <b>Variable</b>         |                                                           | <b>OR</b>                                            | <b>LCI</b> | <b>UCI</b> | <b>OR</b>         | <b>LCI</b> | <b>UCI</b> | <b>OR</b>          | <b>LCI</b> | <b>UCI</b> |
| <b>Demo Variables</b>   | Male vs. Female                                           | 2.00                                                 | 1.59       | 2.52       | 1.94              | 1.50       | 2.52       | 1.89               | 1.50       | 2.38       |
|                         | HS Grad vs. Less than HS                                  | 0.81                                                 | 0.60       | 1.11       | 0.99              | 0.68       | 1.43       | 0.81               | 0.57       | 1.16       |
|                         | More than HS vs. Less than HS                             | 0.44                                                 | 0.31       | 0.63       | 0.50              | 0.30       | 0.82       | 0.38               | 0.24       | 0.59       |
|                         | Not Married vs. Married                                   | 0.62                                                 | 0.49       | 0.80       | 0.63              | 0.48       | 0.84       | 0.67               | 0.52       | 0.87       |
|                         | Poverty 100%-199% FPG vs. Less than 100% FPG              | 1.19                                                 | 0.79       | 1.79       | 1.08              | 0.66       | 1.76       | .                  | .          | .          |
|                         | Poverty ≥200% FPG vs. Less than 100% FPG                  | 0.83                                                 | 0.55       | 1.26       | 0.82              | 0.49       | 1.36       | .                  | .          | .          |
|                         | Former Smoker vs. Current Smoker                          | 2.46                                                 | 1.67       | 3.63       | 3.27              | 2.03       | 5.27       | 2.84               | 1.90       | 4.27       |
|                         | Never Smoked vs. Current Smoker                           | 0.92                                                 | 0.63       | 1.34       | 1.49              | 0.96       | 2.32       | 1.26               | 0.85       | 1.88       |
| <b>Dental Variables</b> | Less than 20 Permanent teeth Yes vs. No                   | .                                                    | .          | .          | .                 | .          | .          | .                  | .          | .          |
|                         | Prevalence of moderate or severe Periodontitis Yes vs. No | .                                                    | .          | .          | .                 | .          | .          | .                  | .          | .          |
|                         | Prevalence of Caries Experience Yes vs. No                | .                                                    | .          | .          | .                 | .          | .          | .                  | .          | .          |
|                         | Prevalence of Untreated Caries Yes vs. No                 | 1.61                                                 | 1.18       | 2.20       | 1.35              | 0.93       | 1.94       | .                  | .          | .          |

**Appendix Figure 1: ROC Curves for Ultrasonography Assessment for Reference and other NAFLD Assessments**

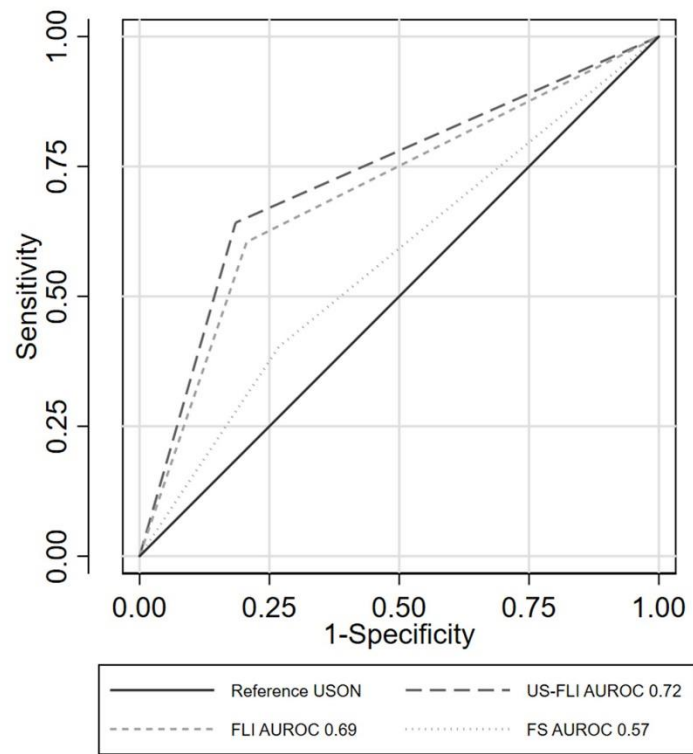

AUROC = Area Under Receiver Operating Characteristic (ROC) Curve; USON= ultrasonography assessment to determine NAFLD,  
FLI=Fatty Liver Index; US-FLI = US Fatty Liver Index; FS=Fibrosis Score
